# Supplementary material for: Synthesis and appraisal of dalbergin-loaded PLGA nanoparticles modified with galactose against hepatocellular carcinoma: In-vitro, pharmacokinetic, and in-silico studies
Source: PubMed Central journal article supplement (PMC9650263; doi:10.3389/fphar.2022.1021867), 2022-10-28
Supplement: DataSheet1.pdf [file DataSheet1.pdf]

# Supplementary sheet

**Synthesis and appraisal of dalbergin-loaded PLGA nanoparticles modified with galactose against hepatocellular carcinoma: *in-vitro*, pharmacokinetic, and *in-silico* studies**

Anurag Kumar Gautam<sup>1</sup>, Pranesh Kumar<sup>1,2</sup>, Biswanath Maity<sup>3</sup>, Ganesh Routholla<sup>4</sup>, Balaram Ghosh<sup>4</sup>, Kumarappan Chidambaram<sup>5</sup>, M.Yasmin Begum<sup>6</sup>, Adel Al Fatease<sup>6</sup>, P.S. Rajinikanth<sup>1</sup>, Sanjay Singh<sup>1</sup>, Sudipta Saha<sup>1†</sup>, Vijayakumar M.R<sup>1\*</sup>

<sup>1</sup>Department of Pharmaceutical Sciences, Babasaheb Bhimrao Ambedkar University, Vidya Vihar, Lucknow, India.

<sup>2</sup>Department of Pharmacology, Aryakul College of Pharmacy & Research, Lucknow, India

<sup>3</sup>Centre of Biomedical Research, SGPGIMS Campus, Raebareli Road, Lucknow, India

<sup>4</sup>Department of Pharmacy, BITS-Pilani Hyderabad Campus, Hyderabad, India

<sup>5</sup>Department of Pharmacology and Toxicology, School of Pharmacy, King Khalid University, Abha, Saudi Arabia

<sup>6</sup>Department of Pharmaceutics, King Khalid University, Abha, Saudi Arabia

† In Memoriam of Dr. Sudipta Saha

**\*Author for Correspondence:**

Dr. Vijayakumar M.R.

Assistant Professor

Department of Pharmaceutical Sciences,

Babasaheb Bhimrao Ambedkar University,

Vidya Vihar, Rai Bareli Road, Lucknow-226025, Uttar Pradesh, India.

Email: [drvijayakumarmr@gmail.com](mailto:drvijayakumarmr@gmail.com)

# Figure A) <sup>1</sup>H-NMR SPECTROSCOPY

<sup>1</sup>H NMR in DMSO-d<sub>6</sub>

06-BG-RG-284  
GANESH

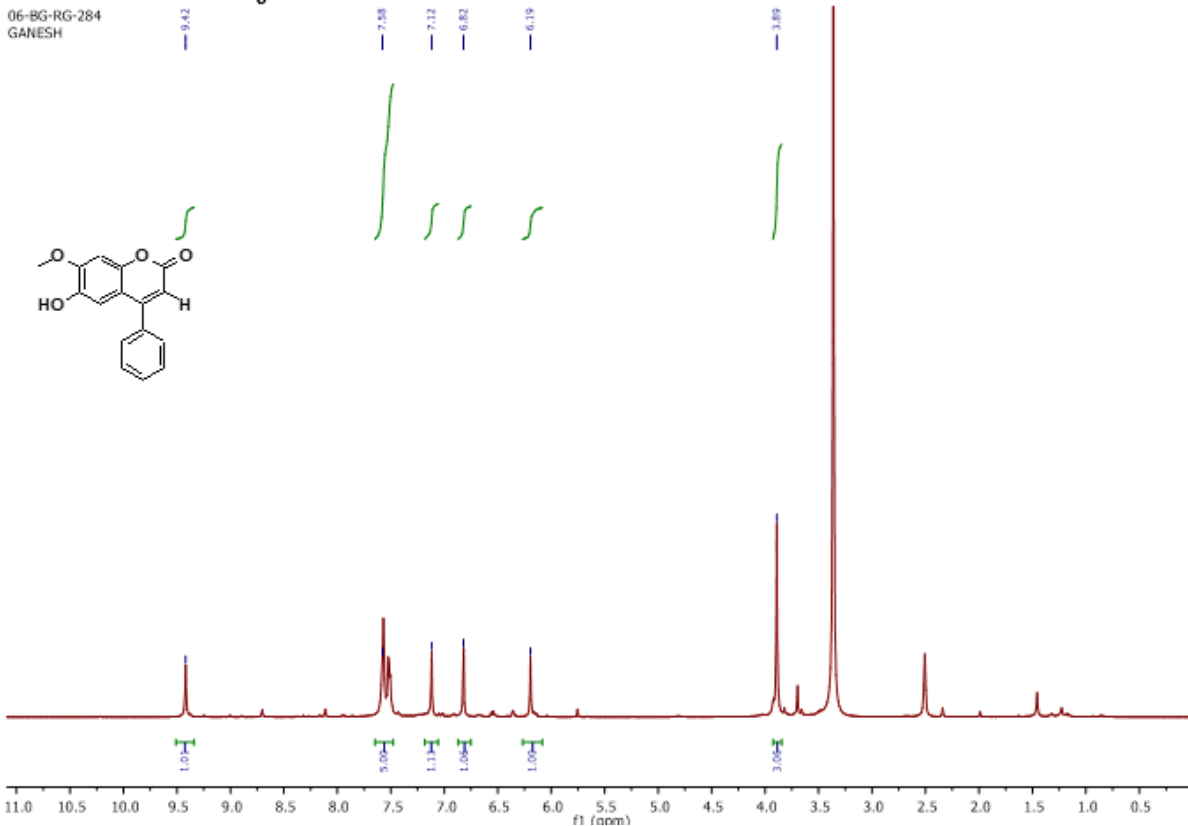

Figure B)  $^{13}\text{C}$ -NMR SPECTROSCOPY

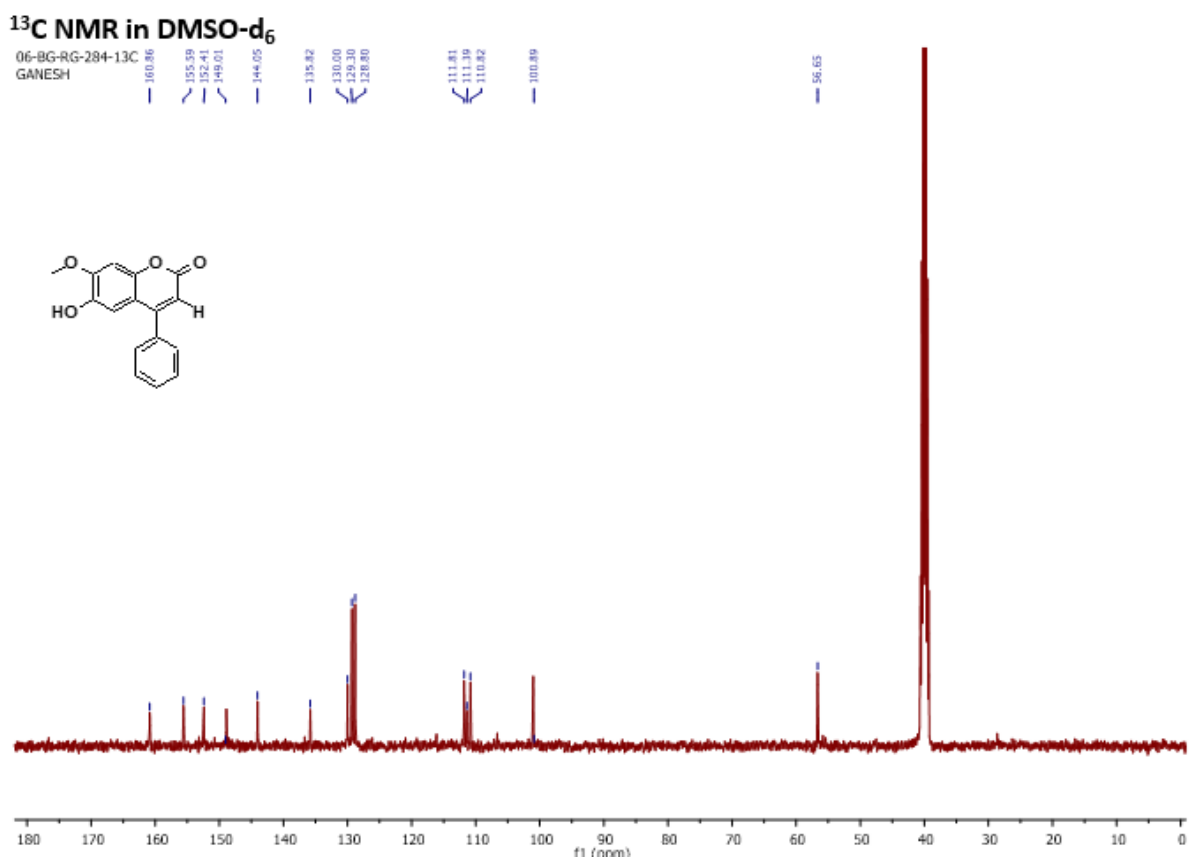

### Figure C) LC-MASS SPECTROMETRY

Mass in methanol:

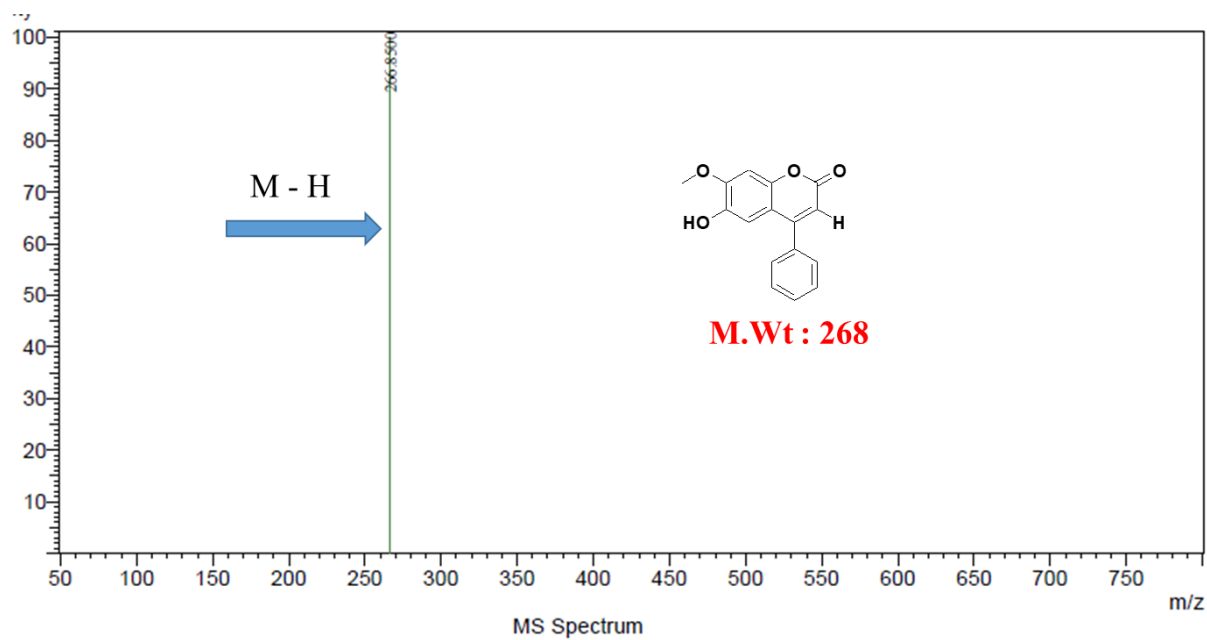

Table S1. Stability Studies of DLMF.

| S.N. | Sampling interval (Days) | Particle Size (nm) |             | Entrapment Efficiency (%) |            |
|------|--------------------------|--------------------|-------------|---------------------------|------------|
|      |                          | 4°C±1°C            | 25°C±2°C    | 4°C±1°C                   | 25°C±2°C   |
| 1    | 0 <sup>th</sup>          | 118.04±2.45        | 122.12±2.23 | 93.14±2.02                | 96.56±2.76 |
| 2    | 30 <sup>th</sup>         | 121.75±2.89        | 119.16±2.74 | 94.42±2.24                | 95.22±2.01 |
| 3    | 60 <sup>th</sup>         | 123.12±2.29        | 123.23±2.26 | 92.23±2.12                | 94.43±1.98 |
| 4    | 90 <sup>th</sup>         | 122.45±2.78        | 124.37±2.25 | 91.33±2.14                | 93.12±2.01 |
